# Supplementary material
Source: PubMed Central journal article supplement (PMC7011202)

SUPPLEMENTARY DATA

**Supplementary Table S1. Crude incidence rates and incidence rate ratios for each race-sex group stratified by age, the REGARDS Study**

| <b>Age &lt;65 years at baseline</b> |              |                     |                       |              |       |                        |              |      |   |
|-------------------------------------|--------------|---------------------|-----------------------|--------------|-------|------------------------|--------------|------|---|
|                                     | <b>n/N *</b> | <b>Person years</b> | <b>IR<sup>†</sup></b> | <b>95%CI</b> |       | <b>IRR<sup>‡</sup></b> | <b>95%CI</b> |      |   |
| <b>White Women</b>                  |              |                     |                       |              |       |                        |              |      |   |
| <b>No Diabetes</b>                  | 38/3296      | 30818.08            | 1.23                  | 0.90         | 1.69  | -                      | -            | -    | - |
| <b>Diabetes</b>                     | 18/373       | 3221.89             | 5.59                  | 3.53         | 8.84  | 4.53                   | 2.59         | 7.91 | - |
| <b>Black Women</b>                  |              |                     |                       |              |       |                        |              |      |   |
| <b>No Diabetes</b>                  | 53/2359      | 20687.66            | 2.56                  | 1.96         | 3.35  | -                      | -            | -    | - |
| <b>Diabetes</b>                     | 34/784       | 6476.72             | 5.25                  | 3.75         | 7.34  | 2.05                   | 1.33         | 3.15 | - |
| <b>White Men</b>                    |              |                     |                       |              |       |                        |              |      |   |
| <b>No Diabetes</b>                  | 63/2795      | 27368.11            | 2.30                  | 1.80         | 2.95  | -                      | -            | -    | - |
| <b>Diabetes</b>                     | 25/459       | 4186.01             | 5.97                  | 4.03         | 8.86  | 2.59                   | 1.63         | 4.13 | - |
| <b>Black Men</b>                    |              |                     |                       |              |       |                        |              |      |   |
| <b>No Diabetes</b>                  | 48/1360      | 11824.12            | 4.06                  | 3.06         | 5.38  | -                      | -            | -    | - |
| <b>Diabetes</b>                     | 23/477       | 4098.58             | 5.61                  | 3.72         | 8.46  | 1.38                   | 0.84         | 2.28 | - |
| <b>Age ≥ 65 years at baseline</b>   |              |                     |                       |              |       |                        |              |      |   |
|                                     |              | <b>Person years</b> | <b>IR<sup>†</sup></b> | <b>95%CI</b> |       | <b>IRR<sup>‡</sup></b> | <b>95%CI</b> |      |   |
| <b>White Women</b>                  |              |                     |                       |              |       |                        |              |      |   |
| <b>No Diabetes</b>                  | 158/2882     | 25358.3             | 6.23                  | 5.33         | 7.28  | -                      | -            | -    | - |
| <b>Diabetes</b>                     | 38/418       | 3174.31             | 11.97                 | 8.72         | 16.43 | 1.92                   | 1.35         | 2.74 | - |
| <b>Black Women</b>                  |              |                     |                       |              |       |                        |              |      |   |
| <b>No Diabetes</b>                  | 112/1740     | 14710.27            | 7.61                  | 6.32         | 9.17  | -                      | -            | -    | - |
| <b>Diabetes</b>                     | 47/723       | 5572.04             | 8.44                  | 6.35         | 11.21 | 1.11                   | 0.79         | 1.56 | - |
| <b>White Men</b>                    |              |                     |                       |              |       |                        |              |      |   |
| <b>No Diabetes</b>                  | 221/3092     | 27339.94            | 8.08                  | 7.08         | 9.22  | -                      | -            | -    | - |
| <b>Diabetes</b>                     | 42/668       | 5142.82             | 8.17                  | 6.03         | 11.06 | 1.01                   | 0.73         | 1.41 | - |
| <b>Black Men</b>                    |              |                     |                       |              |       |                        |              |      |   |
| <b>No Diabetes</b>                  | 56/1079      | 8970.31             | 6.24                  | 4.80         | 8.12  | -                      | -            | -    | - |
| <b>Diabetes</b>                     | 42/497       | 3755.05             | 11.18                 | 8.25         | 15.16 | 1.79                   | 1.20         | 2.68 | - |

\* n in the numerator is total stroke events in each group, n in the denominator is total individuals in the corresponding group

† Incidence Rate Per 1000 person-years

‡ Incidence Rate Ratio

SUPPLEMENTARY DATA

**Supplementary Table S2. Hazard ratios for the association of diabetes with risk of ischemic stroke by age, race and sex groups, the REGARDS Study\***

|                                     | Adjusted Model <sup>†</sup> |      |           |
|-------------------------------------|-----------------------------|------|-----------|
|                                     | n/N                         | HR   | 95%CI     |
| <b>Age &lt;65 years at baseline</b> |                             |      |           |
| White Women with Diabetes           | 18/373                      | 4.10 | 2.30-7.32 |
| White Women without Diabetes        | 34/3296                     | -    | -         |
| Black Women with Diabetes           | 29/784                      | 1.98 | 1.23-3.18 |
| Black Women without Diabetes        | 43/2359                     | -    | -         |
| White Men with Diabetes             | 21/459                      | 1.92 | 1.15-3.20 |
| White Men without Diabetes          | 55/2795                     | -    | -         |
| Black Men with Diabetes             | 22/477                      | 1.40 | 0.83-2.36 |
| Black Men without Diabetes          | 42/1360                     | -    | -         |
| <b>Age ≥ 65 years at baseline</b>   |                             |      |           |
| White Women with Diabetes           | 38/418                      | 1.98 | 1.38-2.86 |
| White Women without Diabetes        | 143/2882                    | -    | -         |
| Black Women with Diabetes           | 44/723                      | 1.08 | 0.75-1.54 |
| Black Women without Diabetes        | 103/1740                    | -    | -         |
| White Men with Diabetes             | 34/668                      | 0.78 | 0.54-1.13 |
| White Men without Diabetes          | 197/3092                    | -    | -         |
| Black Men with Diabetes             | 39/497                      | 1.70 | 1.12-2.58 |
| Black Men without Diabetes          | 52/1079                     | -    | -         |

\* Interaction term age-race-sex-diabetes p = 0.1328

<sup>†</sup> n in the numerator is total stroke events in each group, n in the denominator is total individuals in the corresponding group

Adjusted for education, annual household income, health insurance coverage, geographic region of residence, alcohol consumption, smoking status, and physical activity, body mass index, triglyceride-HDL ratio, LDL cholesterol, statin use, systolic blood pressure, use of anti-hypertensive medications, estimated glomerular filtration rate, albumin to creatinine ratio, history of myocardial infarction, history of atrial fibrillation, left ventricular hypertrophy

**Supplementary Figure S1. Inclusion/Exclusion Flow-Chart of the REGARDS Study Participants**

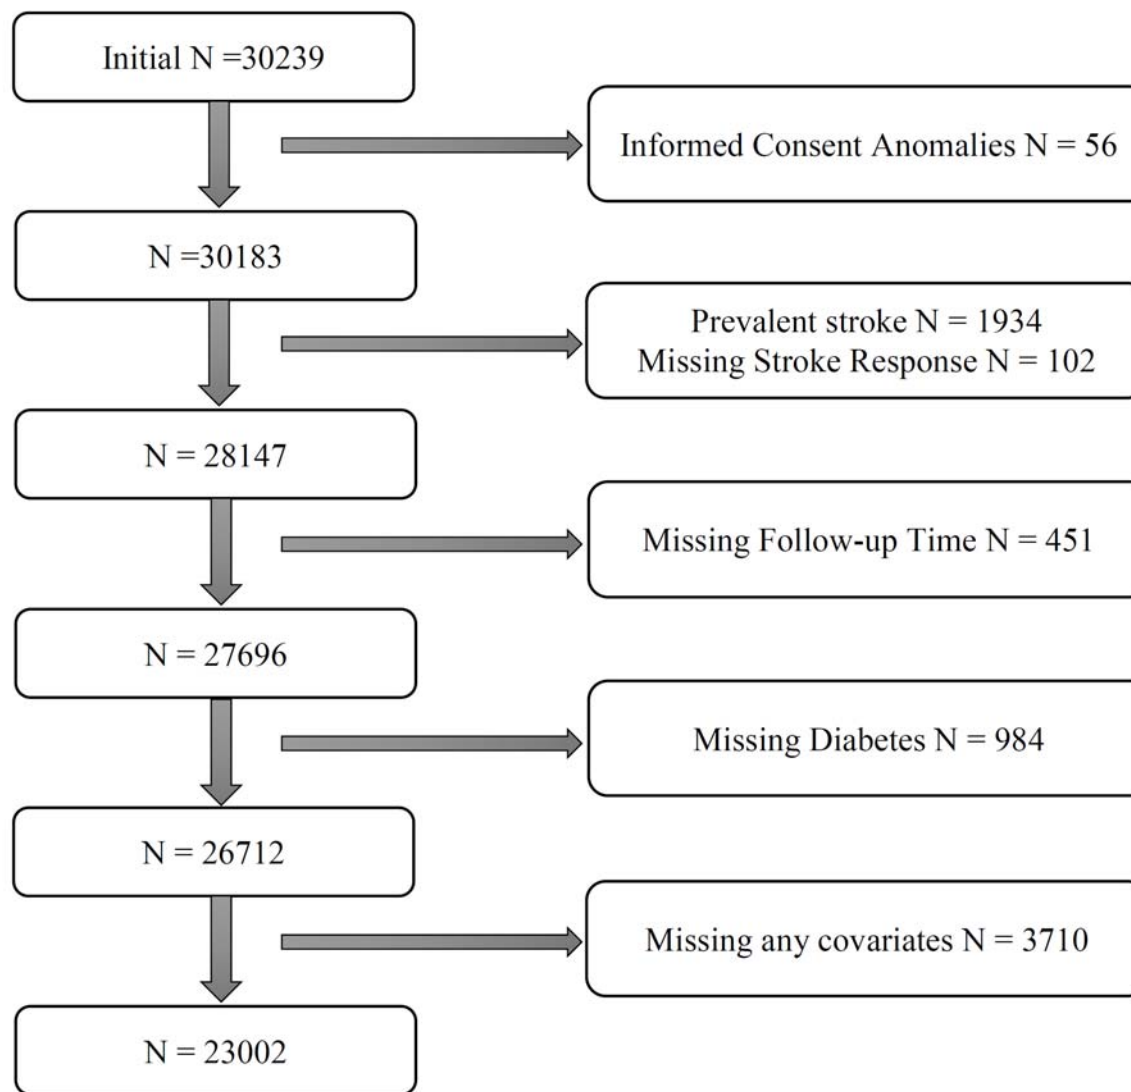

Supplement: DC190442SupplementaryData.pdf [file DC190442SupplementaryData.pdf]
